# Supplementary material for: Early Changes in DCE-MRI Biomarkers May Predict Survival Outcomes in Patients with Advanced Hepatocellular Carcinoma after Sorafenib Failure: Two Prospective Phase II Trials
Source: MDPI journal article supplement (doi:10.3390/cancers13194962), 2021-10-01
Supplement: s1 [file s1]

## Supplementary file

**Table S1. Patient clinical and imaging characteristics according to treatment response**

|                                              | <b>PR</b>   | <b>SD</b>   | <b>PD</b>   | <b>P value</b> |
|----------------------------------------------|-------------|-------------|-------------|----------------|
| <b>Number</b>                                | 8           | 35          | 31          |                |
| <b>Age, year (mean, SD)</b>                  | 60.9 (10.8) | 60.5 (12.9) | 59.2 (11.1) | 0.885          |
| <b>Sex (women)</b>                           | 1 (12.5)    | 5 (14.3)    | 4 (12.9)    | 0.983          |
| <b>Tumor size (cm<sup>2</sup>, mean, SD)</b> | 85.4 (65.6) | 85.9 (56)   | 76.1 (42)   | 0.729          |
| <b>Etiology</b>                              |             |             |             |                |
| <b>Hepatitis B</b>                           | 4 (50.0)    | 24 (68.6)   | 23 (74.2)   | 0.419          |
| <b>Hepatitis C</b>                           | 3 (37.5)    | 6 (17.1)    | 5 (16.1)    | 0.362          |
| <b>Alcoholic</b>                             | 3 (37.5)    | 1 (2.9)     | 2 (6.5)     | 0.005          |
| <b>ECOG</b>                                  |             |             |             | 0.078          |
| <b>0</b>                                     | 0 (0)       | 13 (37.1)   | 7 (22.6)    |                |
| <b>1</b>                                     | 8 (100.0)   | 22 (62.9)   | 24 (77.4)   |                |
| <b>AFP &gt; 400 ng/mL</b>                    | 7 (87.5)    | 16 (45.7)   | 18 (58.1)   | 0.093          |
| <b>Liver cirrhosis</b>                       | 7 (87.5)    | 26 (74.3)   | 22 (71)     | 0.542          |
| <b>Vascular invasion</b>                     | 6 (75.0)    | 18 (51.4)   | 17 (54.8)   | 0.479          |
| <b>Extrahepatic spread</b>                   | 7 (87.5)    | 29 (82.9)   | 27 (87.1)   | 0.872          |
| <b>Child-Pugh</b>                            |             |             |             | 0.03           |
| <b>5</b>                                     | 3 (27.5)    | 29 (82.9)   | 23 (74.2)   |                |
| <b>6</b>                                     | 5 (62.5)    | 6 (17.1)    | 8 (25.8)    |                |
| <b>Prior therapy</b>                         |             |             |             |                |
| <b>Surgery</b>                               | 2 (25.0)    | 20 (57.1)   | 14 (45.2)   | 0.228          |
| <b>Ablation</b>                              | 2 (25.0)    | 11 (31.4)   | 6 (19.4)    | 0.533          |
| <b>TACE</b>                                  | 7 (87.5)    | 27 (77.1)   | 26 (83.9)   | 0.696          |

Note. – Unless otherwise indicated, data are numbers, and data in parenthesis are percentages. PR = partial response, SD = stable disease, PD = progressive disease, AFP = alpha-fetoprotein, TACE = transarterial chemoembolization, ECOG = Eastern Cooperative Oncology Group.

**Table S2. Comparison of changes of DCE-MRI parameters and cutoff values by disease control rate (DCR)**

| DCE-MRI parameters                                | PR + SD                 | PD                     | P value | Cutoff values | AUROC | Sensitivity | Specificity |
|---------------------------------------------------|-------------------------|------------------------|---------|---------------|-------|-------------|-------------|
| $\Delta\text{Peak\_D3 (\%)}$                      | -3.0<br>(-12.1, 3.7)    | -6.4<br>(-13.3, 4.0)   | 0.722   | -5.8          | 0.52  | 0.55        | 0.65        |
| $\Delta\text{AUC\_D3 (\%)}$                       | -11.20<br>(-37.1, 11.9) | -12.<br>(-31.9, 18.8)  | 0.969   | -54.6         | 0.5   | 0.97        | 0.16        |
| $\Delta\text{K}^{\text{trans}}_{\text{D3 (\%)}}$  | -30.20<br>(-60.6, 14.9) | 0.00<br>(-33.1, 44.9)  | 0.075   | -9.3          | 0.62  | 0.58        | 0.67        |
| $\Delta\text{Peak\_D14 (\%)}$                     | -3.1<br>(-16.3, 2.6)    | -7.0<br>(-15.1, 5.8)   | 0.932   | 4.59          | 0.51  | 0.33        | 0.83        |
| $\Delta\text{AUC\_D14 (\%)}$                      | -25.5<br>(-42.3, 8.4)   | -15.3<br>(-49.4, 26.6) | 0.656   | -21.1         | 0.53  | 0.67        | 0.52        |
| $\Delta\text{K}^{\text{trans}}_{\text{D14 (\%)}}$ | -44.6<br>(-61.7, -14.9) | -3.4<br>(-40.9, 95.4)  | 0.01    | -11.8         | 0.68  | 0.63        | 0.76        |

Note. – The data are expressed as median and interquartile range.

\* *P* value indicates a significant difference. Youden index is used for seeking the best cutoff value for ROC Curve.

PR = partial response, SD = stable disease, PD = progressive disease, AUROC = area under the receiver operating characteristic.
